# Supplementary material
Source: PubMed Central journal article supplement (PMC4270849)
Supplement: NIHMS633494-supplement-000556_-_Supplemental_Material.pdf [file NIHMS633494-supplement-000556_-_Supplemental_Material.pdf]

## **SUPPLEMENTAL MATERIAL**

**Supplemental Table 1** Summary characteristics of study cohorts

|                              | ARIC Europeans    |                   | FHS Europeans     |                   | Combined*         |                   |
|------------------------------|-------------------|-------------------|-------------------|-------------------|-------------------|-------------------|
|                              | Male (N=2402)     | Females (N=2835)  | Male (N=1365)     | Females (N=1606)  | Male (N=3767)     | Females (N=4441)  |
|                              | Mean $\pm$ SD     |
| Age                          | 53.81 $\pm$ 5.60  | 53.19 $\pm$ 5.55  | 39.30 $\pm$ 8.62  | 39.35 $\pm$ 8.69  | 48.55 $\pm$ 9.78  | 48.18 $\pm$ 9.55  |
| BMI (kg/m <sup>2</sup> )     | 26.75 $\pm$ 3.66  | 25.36 $\pm$ 4.72  | 27.53 $\pm$ 4.36  | 25.38 $\pm$ 5.45  | 27.04 $\pm$ 3.95  | 25.37 $\pm$ 5.00  |
| Serum urate (mmol/L)         | 0.379 $\pm$ 0.071 | 0.293 $\pm$ 0.064 | 0.369 $\pm$ 0.070 | 0.254 $\pm$ 0.058 | 0.375 $\pm$ 0.071 | 0.279 $\pm$ 0.065 |
| Serum triglycerides (mmol/L) | 1.531 $\pm$ 1.006 | 1.277 $\pm$ 0.726 | 1.467 $\pm$ 1.218 | 1.050 $\pm$ 0.596 | 1.508 $\pm$ 1.088 | 1.195 $\pm$ 0.691 |

\* Standard deviation (SD) in combined males and females: SU=0.083, Tg=0.909.

**Supplemental Table 2** Serum urate and serum triglyceride levels according to uric acid transporter genetic risk score

| Genetic Risk Score    |      | Serum Urate (mmol/L) |       | Serum Triglycerides (mmol/L) |       |
|-----------------------|------|----------------------|-------|------------------------------|-------|
| All                   | Obs. | Mean                 | SD    | Mean                         | SD    |
| <b>ARIC Europeans</b> |      |                      |       |                              |       |
| 0                     | 13   | 0.262                | 0.102 | 1.335                        | 1.007 |
| 1                     | 100  | 0.289                | 0.080 | 1.403                        | 1.198 |
| 2                     | 438  | 0.313                | 0.083 | 1.444                        | 0.936 |
| 3                     | 965  | 0.321                | 0.079 | 1.415                        | 0.999 |
| 4                     | 1316 | 0.334                | 0.079 | 1.397                        | 0.857 |
| 5                     | 1289 | 0.339                | 0.079 | 1.351                        | 0.793 |
| 6                     | 750  | 0.341                | 0.078 | 1.392                        | 0.800 |
| 7                     | 264  | 0.351                | 0.076 | 1.469                        | 0.900 |
| 8                     | 93   | 0.354                | 0.072 | 1.253                        | 0.576 |
| 9                     | 9    | 0.389                | 0.095 | 1.392                        | 0.523 |
| 10                    | 0    |                      |       |                              |       |
| <b>FHS Europeans</b>  |      |                      |       |                              |       |
| 0                     | 2    | 0.239                | 0.129 | 1.616                        | 0.495 |
| 1                     | 61   | 0.285                | 0.095 | 1.320                        | 0.804 |
| 2                     | 265  | 0.283                | 0.084 | 1.248                        | 1.070 |
| 3                     | 598  | 0.295                | 0.087 | 1.291                        | 1.126 |
| 4                     | 763  | 0.305                | 0.084 | 1.227                        | 0.875 |
| 5                     | 663  | 0.311                | 0.085 | 1.212                        | 0.948 |
| 6                     | 428  | 0.327                | 0.087 | 1.237                        | 0.837 |
| 7                     | 144  | 0.323                | 0.083 | 1.241                        | 0.966 |
| 8                     | 42   | 0.323                | 0.077 | 1.169                        | 0.696 |
| 9                     | 5    | 0.408                | 0.075 | 1.356                        | 1.046 |
| 10                    | 0    |                      |       |                              |       |
| <b>Combined</b>       |      |                      |       |                              |       |
| 0                     | 15   | 0.259                | 0.101 | 1.372                        | 0.947 |
| 1                     | 161  | 0.288                | 0.085 | 1.348                        | 1.024 |
| 2                     | 703  | 0.301                | 0.085 | 1.370                        | 0.992 |
| 3                     | 1563 | 0.311                | 0.083 | 1.368                        | 1.051 |
| 4                     | 2079 | 0.323                | 0.082 | 1.335                        | 0.868 |
| 5                     | 1952 | 0.329                | 0.082 | 1.304                        | 0.851 |
| 6                     | 1178 | 0.336                | 0.082 | 1.336                        | 0.817 |
| 7                     | 410  | 0.341                | 0.080 | 1.389                        | 0.930 |
| 8                     | 135  | 0.344                | 0.074 | 1.227                        | 0.614 |
| 9                     | 14   | 0.396                | 0.086 | 1.379                        | 0.711 |
| 10                    | 0    |                      |       |                              |       |
| <b>Males</b>          |      |                      |       |                              |       |
| <b>ARIC Europeans</b> |      |                      |       |                              |       |
| 0                     | 6    | 0.343                | 0.086 | 1.577                        | 1.039 |
| 1                     | 43   | 0.343                | 0.064 | 1.853                        | 1.655 |
| 2                     | 193  | 0.365                | 0.072 | 1.478                        | 0.898 |
| 3                     | 441  | 0.366                | 0.071 | 1.554                        | 1.278 |
| 4                     | 623  | 0.377                | 0.069 | 1.535                        | 0.933 |
| 5                     | 594  | 0.386                | 0.071 | 1.494                        | 0.898 |
| 6                     | 333  | 0.387                | 0.071 | 1.538                        | 0.906 |
| 7                     | 122  | 0.401                | 0.061 | 1.632                        | 1.000 |
| 8                     | 44   | 0.405                | 0.057 | 1.335                        | 0.513 |
| 9                     | 3    | 0.443                | 0.074 | 1.562                        | 0.697 |
| 10                    | 0    |                      |       |                              |       |
| <b>FHS Europeans</b>  |      |                      |       |                              |       |
| 0                     | 1    | 0.330                | —     | 1.966                        | —     |
| 1                     | 31   | 0.359                | 0.066 | 1.489                        | 0.463 |
| 2                     | 117  | 0.347                | 0.068 | 1.529                        | 1.456 |
| 3                     | 257  | 0.361                | 0.074 | 1.590                        | 1.507 |
| 4                     | 363  | 0.364                | 0.071 | 1.398                        | 1.037 |

|          |     |       |       |       |       |
|----------|-----|-------|-------|-------|-------|
| 5        | 301 | 0.375 | 0.066 | 1.456 | 1.223 |
| 6        | 211 | 0.387 | 0.068 | 1.414 | 1.002 |
| 7        | 62  | 0.380 | 0.076 | 1.490 | 1.347 |
| 8        | 17  | 0.369 | 0.073 | 1.390 | 0.822 |
| 9        | 5   | 0.408 | 0.075 | 1.356 | 1.046 |
| 10       | 0   |       |       |       |       |
| Combined |     |       |       |       |       |
| 0        | 7   | 0.341 | 0.079 | 1.632 | 0.960 |
| 1        | 74  | 0.350 | 0.065 | 0.701 | 1.345 |
| 2        | 310 | 0.358 | 0.071 | 1.497 | 1.139 |
| 3        | 698 | 0.364 | 0.072 | 1.567 | 1.366 |
| 4        | 986 | 0.372 | 0.070 | 1.484 | 0.975 |
| 5        | 895 | 0.382 | 0.069 | 1.481 | 1.019 |
| 6        | 544 | 0.387 | 0.069 | 1.490 | 0.945 |
| 7        | 184 | 0.394 | 0.067 | 1.584 | 1.127 |
| 8        | 61  | 0.395 | 0.063 | 1.350 | 0.608 |
| 9        | 8   | 0.421 | 0.071 | 1.433 | 0.880 |
| 10       | 0   |       |       |       |       |

---

**Females**

---

ARIC Europeans

|    |     |       |       |       |       |
|----|-----|-------|-------|-------|-------|
| 0  | 7   | 0.193 | 0.048 | 1.127 | 0.497 |
| 1  | 57  | 0.248 | 0.065 | 1.063 | 0.485 |
| 2  | 245 | 0.271 | 0.065 | 1.417 | 0.966 |
| 3  | 524 | 0.283 | 0.063 | 1.298 | 0.659 |
| 4  | 693 | 0.295 | 0.066 | 1.274 | 0.763 |
| 5  | 695 | 0.298 | 0.061 | 1.230 | 0.668 |
| 6  | 417 | 0.304 | 0.063 | 1.276 | 0.682 |
| 7  | 142 | 0.307 | 0.060 | 1.331 | 0.785 |
| 8  | 49  | 0.308 | 0.050 | 1.180 | 0.624 |
| 9  | 6   | 0.362 | 0.099 | 1.308 | 0.466 |
| 10 | 0   |       |       |       |       |

FHS Europeans

|    |     |       |       |       |       |
|----|-----|-------|-------|-------|-------|
| 0  | 1   | 0.148 |       | 1.266 |       |
| 1  | 30  | 0.208 | 0.046 | 1.020 | 0.486 |
| 2  | 148 | 0.233 | 0.058 | 1.026 | 0.523 |
| 3  | 341 | 0.245 | 0.058 | 1.068 | 0.633 |
| 4  | 400 | 0.252 | 0.055 | 1.072 | 0.661 |
| 5  | 362 | 0.257 | 0.056 | 1.010 | 0.559 |
| 6  | 217 | 0.270 | 0.060 | 1.065 | 0.592 |
| 7  | 82  | 0.280 | 0.058 | 1.053 | 0.444 |
| 8  | 25  | 0.292 | 0.063 | 1.019 | 0.564 |
| 9  | 0   |       |       |       |       |
| 10 | 0   |       |       |       |       |

Combined

|    |      |       |       |       |       |
|----|------|-------|-------|-------|-------|
| 0  | 8    | 0.187 | 0.047 | 1.145 | 0.936 |
| 1  | 87   | 0.235 | 0.062 | 1.048 | 0.464 |
| 2  | 393  | 0.257 | 0.065 | 1.269 | 0.848 |
| 3  | 865  | 0.268 | 0.064 | 1.207 | 0.658 |
| 4  | 1093 | 0.279 | 0.065 | 1.200 | 0.733 |
| 5  | 1057 | 0.284 | 0.063 | 1.154 | 0.641 |
| 6  | 634  | 0.292 | 0.064 | 1.204 | 0.660 |
| 7  | 224  | 0.297 | 0.060 | 1.229 | 0.692 |
| 8  | 74   | 0.303 | 0.055 | 1.125 | 0.605 |
| 9  | 6    | 0.362 | 0.099 | 1.308 | 0.466 |
| 10 | 0    |       |       |       |       |

---

**Supplemental Table 3** Serum urate and serum Tg levels according to Tg genetic risk score

| Genetic Risk Score |      | Serum Urate (mmol/L) |       | Serum Triglycerides (mmol/L) |       |
|--------------------|------|----------------------|-------|------------------------------|-------|
| All                | Obs. | Mean                 | SD    | Mean                         | SD    |
| ARIC Europeans     |      |                      |       |                              |       |
| 3                  | 2    | 0.378                | 0.025 | 0.706                        | 0.040 |
| 4                  | 7    | 0.303                | 0.057 | 1.032                        | 0.498 |
| 5                  | 45   | 0.338                | 0.064 | 1.134                        | 0.616 |
| 6                  | 194  | 0.329                | 0.072 | 1.230                        | 0.749 |
| 7                  | 471  | 0.331                | 0.081 | 1.254                        | 0.702 |
| 8                  | 967  | 0.329                | 0.080 | 1.278                        | 0.762 |
| 9                  | 1294 | 0.334                | 0.080 | 1.404                        | 0.907 |
| 10                 | 1174 | 0.333                | 0.080 | 1.446                        | 0.826 |
| 11                 | 701  | 0.332                | 0.081 | 1.488                        | 0.877 |
| 12                 | 292  | 0.335                | 0.080 | 1.598                        | 1.352 |
| 13                 | 82   | 0.328                | 0.079 | 1.632                        | 0.987 |
| 14                 | 7    | 0.389                | 0.107 | 1.645                        | 0.921 |
| 15                 | 1    | 0.366                | –     | 4.437                        | –     |
| FHS Europeans      |      |                      |       |                              |       |
| 3                  | 0    | –                    | –     | –                            | –     |
| 4                  | 1    | 0.283                | –     | 0.520                        | –     |
| 5                  | 22   | 0.319                | 0.090 | 0.929                        | 0.538 |
| 6                  | 78   | 0.305                | 0.072 | 0.894                        | 0.403 |
| 7                  | 264  | 0.300                | 0.087 | 1.054                        | 0.607 |
| 8                  | 515  | 0.309                | 0.087 | 1.169                        | 0.862 |
| 9                  | 723  | 0.308                | 0.083 | 1.188                        | 0.737 |
| 10                 | 693  | 0.301                | 0.086 | 1.247                        | 0.903 |
| 11                 | 428  | 0.309                | 0.089 | 1.387                        | 1.142 |
| 12                 | 191  | 0.311                | 0.09  | 1.638                        | 1.756 |
| 13                 | 44   | 0.324                | 0.099 | 1.499                        | 0.949 |
| 14                 | 11   | 0.31                 | 0.077 | 1.792                        | 1.314 |
| 15                 | 1    | 0.325                | –     | 1.187                        | –     |
| Combined           |      |                      |       |                              |       |
| 3                  | 2    | 0.378                | 0.025 | 0.706                        | 0.040 |
| 4                  | 8    | 0.301                | 0.053 | 0.968                        | 0.496 |
| 5                  | 67   | 0.332                | 0.073 | 1.067                        | 0.595 |
| 6                  | 272  | 0.322                | 0.073 | 1.133                        | 0.684 |
| 7                  | 735  | 0.320                | 0.085 | 1.182                        | 0.679 |
| 8                  | 1482 | 0.322                | 0.083 | 1.240                        | 0.799 |
| 9                  | 2017 | 0.325                | 0.082 | 1.326                        | 0.856 |
| 10                 | 1867 | 0.321                | 0.084 | 1.372                        | 0.860 |
| 11                 | 1129 | 0.323                | 0.085 | 1.450                        | 0.987 |
| 12                 | 483  | 0.326                | 0.085 | 1.614                        | 1.523 |
| 13                 | 126  | 0.327                | 0.086 | 1.585                        | 0.972 |
| 14                 | 18   | 0.341                | 0.095 | 1.735                        | 1.149 |
| 15                 | 2    | 0.345                | 0.029 | 2.812                        | 2.298 |
| <b>Males</b>       |      |                      |       |                              |       |
| ARIC Europeans     |      |                      |       |                              |       |
| 3                  | 1    | 0.395                | –     | 0.677                        | –     |
| 4                  | 2    | 0.339                | 0.038 | 1.287                        | 0.048 |
| 5                  | 16   | 0.370                | 0.059 | 1.398                        | 0.718 |
| 6                  | 90   | 0.374                | 0.060 | 1.411                        | 0.875 |
| 7                  | 225  | 0.374                | 0.075 | 1.364                        | 0.733 |
| 8                  | 431  | 0.377                | 0.070 | 1.379                        | 0.919 |
| 9                  | 584  | 0.381                | 0.073 | 1.502                        | 0.955 |
| 10                 | 553  | 0.379                | 0.069 | 1.592                        | 0.871 |
| 11                 | 310  | 0.382                | 0.071 | 1.691                        | 1.103 |
| 12                 | 141  | 0.380                | 0.070 | 1.793                        | 1.773 |
| 13                 | 44   | 0.375                | 0.061 | 1.856                        | 1.172 |

|               |     |       |       |       |       |
|---------------|-----|-------|-------|-------|-------|
| 14            | 5   | 0.424 | 0.092 | 1.985 | 0.875 |
| 15            | 0   | –     | –     | –     | –     |
| FHS Europeans |     |       |       |       |       |
| 3             | 0   | –     | –     | –     | –     |
| 4             | 1   | 0.283 | –     | 0.520 | –     |
| 5             | 11  | 0.359 | 0.088 | 0.963 | 0.342 |
| 6             | 34  | 0.357 | 0.052 | 0.911 | 0.393 |
| 7             | 118 | 0.361 | 0.072 | 1.229 | 0.740 |
| 8             | 243 | 0.370 | 0.069 | 1.393 | 1.078 |
| 9             | 342 | 0.369 | 0.067 | 1.399 | 0.883 |
| 10            | 298 | 0.364 | 0.078 | 1.452 | 1.115 |
| 11            | 199 | 0.377 | 0.068 | 1.625 | 1.488 |
| 12            | 91  | 0.377 | 0.069 | 2.137 | 2.345 |
| 13            | 21  | 0.391 | 0.073 | 1.641 | 0.997 |
| 14            | 6   | 0.34  | 0.081 | 2.026 | 1.59  |
| 15            | 1   | 0.325 | –     | 1.187 | –     |
| Combined      |     |       |       |       |       |
| 3             | 1   | 0.395 | –     | 0.677 | –     |
| 4             | 3   | 0.321 | 0.042 | 1.031 | 0.444 |
| 5             | 27  | 0.366 | 0.071 | 1.221 | 0.625 |
| 6             | 124 | 0.369 | 0.058 | 1.273 | 0.803 |
| 7             | 343 | 0.369 | 0.074 | 1.318 | 0.737 |
| 8             | 674 | 0.374 | 0.069 | 1.382 | 0.975 |
| 9             | 926 | 0.376 | 0.071 | 1.463 | 0.930 |
| 10            | 851 | 0.374 | 0.073 | 1.543 | 0.965 |
| 11            | 509 | 0.380 | 0.070 | 1.666 | 1.267 |
| 12            | 232 | 0.379 | 0.070 | 1.928 | 2.019 |
| 13            | 65  | 0.380 | 0.065 | 1.787 | 1.116 |
| 14            | 11  | 0.378 | 0.093 | 2.008 | 1.253 |
| 15            | 1   | 0.325 | –     | 1.187 | –     |

---

**Females**

---

|                |     |       |       |       |       |
|----------------|-----|-------|-------|-------|-------|
| ARIC Europeans |     |       |       |       |       |
| 3              | 1   | 0.360 | –     | 0.734 | –     |
| 4              | 5   | 0.321 | 0.042 | 1.031 | 0.444 |
| 5              | 29  | 0.321 | 0.060 | 0.989 | 0.507 |
| 6              | 104 | 0.290 | 0.058 | 1.074 | 0.581 |
| 7              | 246 | 0.292 | 0.066 | 1.154 | 0.667 |
| 8              | 536 | 0.291 | 0.066 | 1.197 | 0.597 |
| 9              | 710 | 0.295 | 0.063 | 1.324 | 0.858 |
| 10             | 621 | 0.292 | 0.065 | 1.316 | 0.760 |
| 11             | 391 | 0.292 | 0.064 | 1.326 | 0.595 |
| 12             | 151 | 0.295 | 0.065 | 1.427 | 0.759 |
| 13             | 38  | 0.274 | 0.061 | 1.371 | 0.637 |
| 14             | 2   | 0.304 | 0.121 | 0.796 | 0.088 |
| 15             | 1   | 0.366 | –     | 4.437 | –     |
| FHS Europeans  |     |       |       |       |       |
| 3              | 0   | –     | –     | –     | –     |
| 4              | 0   | –     | –     | –     | –     |
| 5              | 11  | 0.280 | 0.076 | 0.896 | 0.698 |
| 6              | 44  | 0.265 | 0.059 | 0.881 | 0.415 |
| 7              | 146 | 0.252 | 0.065 | 0.913 | 0.427 |
| 8              | 272 | 0.255 | 0.062 | 0.969 | 0.536 |
| 9              | 381 | 0.254 | 0.056 | 0.998 | 0.506 |
| 10             | 395 | 0.252 | 0.055 | 1.093 | 0.663 |
| 11             | 229 | 0.250 | 0.058 | 1.181 | 0.656 |
| 12             | 100 | 0.251 | 0.058 | 1.184 | 0.692 |
| 13             | 23  | 0.263 | 0.079 | 1.369 | 0.906 |
| 14             | 5   | 0.273 | 0.057 | 1.51  | 0.988 |
| 15             | 0   | –     | –     | –     | –     |
| Combined       |     |       |       |       |       |
| 3              | 1   | 0.360 | –     | 0.734 | –     |

|    |      |       |       |       |       |
|----|------|-------|-------|-------|-------|
| 4  | 5    | 0.289 | 0.060 | 0.930 | 0.571 |
| 5  | 40   | 0.309 | 0.066 | 0.963 | 0.558 |
| 6  | 148  | 0.282 | 0.059 | 1.017 | 0.543 |
| 7  | 392  | 0.277 | 0.068 | 1.064 | 0.600 |
| 8  | 808  | 0.279 | 0.067 | 1.120 | 0.587 |
| 9  | 1091 | 0.281 | 0.064 | 1.210 | 0.769 |
| 10 | 1016 | 0.277 | 0.064 | 1.229 | 0.732 |
| 11 | 620  | 0.276 | 0.065 | 1.272 | 0.622 |
| 12 | 251  | 0.277 | 0.066 | 1.330 | 0.741 |
| 13 | 61   | 0.270 | 0.068 | 1.370 | 0.743 |
| 14 | 7    | 0.282 | 0.070 | 1.306 | 0.880 |
| 15 | 1    | 0.366 | —     | 4.437 | —     |

---

**Supplemental Table 4** Analysis of association of uric acid transporter genetic risk score with tested confounders by linear regression

|                         |                |          | Beta    | SE     | P     |
|-------------------------|----------------|----------|---------|--------|-------|
| Age                     | ARIC Europeans | Crude    | -0.004  | 0.052  | 0.933 |
|                         |                | Adjusted | -0.016  | 0.049  | 0.739 |
|                         | FHS Europeans  | Crude    | 0.112   | 0.108  | 0.296 |
|                         |                | Adjusted | 0.118   | 0.099  | 0.232 |
|                         | Combined       | Crude    | 0.137   | 0.072  | 0.057 |
|                         |                | Adjusted | 0.029   | 0.048  | 0.550 |
| Sex                     | ARIC Europeans | Crude    | -0.001  | 0.005  | 0.865 |
|                         |                | Adjusted | -0.0004 | 0.004  | 0.927 |
|                         | FHS Europeans  | Crude    | -0.005  | 0.006  | 0.384 |
|                         |                | Adjusted | -0.008  | 0.005  | 0.123 |
|                         | Combined       | Crude    | -0.002  | 0.004  | 0.511 |
|                         |                | Adjusted | -0.004  | 0.003  | 0.276 |
| BMI                     | ARIC Europeans | Crude    | -0.024  | 0.040  | 0.553 |
|                         |                | Adjusted | -0.016  | 0.037  | 0.655 |
|                         | FHS Europeans  | Crude    | -0.103  | 0.063  | 0.105 |
|                         |                | Adjusted | -0.078  | 0.055  | 0.160 |
|                         | Combined       | Crude    | -0.054  | 0.034  | 0.113 |
|                         |                | Adjusted | -0.041  | 0.031  | 0.183 |
| eGFR                    | ARIC Europeans | Crude    | 0.135   | 0.092  | 0.142 |
|                         |                | Adjusted | 0.111   | 0.088  | 0.205 |
|                         | FHS Europeans  | Crude    | -0.005  | 0.224  | 0.983 |
|                         |                | Adjusted | 0.064   | 0.217  | 0.768 |
|                         | Combine        | Crude    | -0.164  | 0.161  | 0.310 |
|                         |                | Adjusted | 0.073   | 0.097  | 0.452 |
| Systolic blood pressure | ARIC Europeans | Crude    | 0.184   | 0.134  | 0.170 |
|                         |                | Adjusted | 0.162   | 0.125  | 0.196 |
|                         | FHS Europeans  | Crude    | -0.177  | 0.170  | 0.296 |
|                         |                | Adjusted | -0.193  | 0.150  | 0.198 |
|                         | Combined       | Crude    | 0.043   | 0.105  | 0.682 |
|                         |                | Adjusted | 0.032   | 0.097  | 0.742 |
| LDL-C                   | ARIC Europeans | Crude    | -0.0052 | 0.0090 | 0.566 |
|                         |                | Adjusted | -0.0028 | 0.0086 | 0.742 |
|                         | FHS Europeans  | Crude    | 0.0085  | 0.0104 | 0.412 |
|                         |                | Adjusted | 0.0094  | 0.0096 | 0.323 |
|                         | Combined       | Crude    | 0.0041  | 0.0072 | 0.570 |
|                         |                | Adjusted | 0.0017  | 0.0065 | 0.793 |
| HDL-C                   |                |          |         |        |       |



|      |                |          |           |          |        |
|------|----------------|----------|-----------|----------|--------|
|      | ARIC Europeans | Crude    | 0.0027    | 0.0041   | 0.514  |
|      |                | Adjusted | 0.0016    | 0.0034   | 0.634  |
|      | FHS Europeans  | Crude    | 0.0028    | 0.0051   | 0.582  |
|      |                | Adjusted | 0.0030    | 0.0043   | 0.485  |
|      | Combined       | Crude    | 0.0022    | 0.0032   | 0.494  |
|      |                | Adjusted | 0.0023    | 0.0027   | 0.397  |
| PCA1 |                |          |           |          |        |
|      | ARIC Europeans | Crude    | 0.000001  | 0.000004 | 0.794  |
|      |                | Adjusted | -0.000007 | 0.000004 | 0.856  |
|      | FHS Europeans  | Crude    | -0.00045  | 0.00014  | 0.001  |
|      |                | Adjusted | -0.00047  | 0.00014  | 0.001  |
|      | Combined       | Crude    | -0.00019  | 0.00005  | 0.0002 |
|      |                | Adjusted | -0.00016  | 0.00005  | 0.001  |
| PCA2 |                |          |           |          |        |
|      | ARIC Europeans | Crude    | 0.00007   | 0.00008  | 0.365  |
|      |                | Adjusted | 0.00007   | 0.00007  | 0.333  |
|      | FHS Europeans  | Crude    | 0.00009   | 0.00018  | 0.642  |
|      |                | Adjusted | 0.00004   | 0.00018  | 0.822  |
|      | Combined       | Crude    | 0.00007   | 0.00008  | 0.377  |
|      |                | Adjusted | 0.00007   | 0.00008  | 0.399  |

---

Each independent test variable was adjusted by the other eight variables (as a possible confounder). The combined analysis was additionally adjusted by study of origin. BMI, body mass index; eGFR, estimated glomerular filtration rate; LDL-C, low-density lipoprotein cholesterol; HDL-C, high-density lipoprotein cholesterol; PCA, principal component analysis.

**Supplemental Table 5** Analysis of association of triglyceride genetic risk score with tested confounders by linear regression

|      |                |          | Beta      | SE       | P     |
|------|----------------|----------|-----------|----------|-------|
| Age  | ARIC Europeans | Crude    | 0.028     | 0.048    | 0.565 |
|      |                | Adjusted | 0.025     | 0.048    | 0.605 |
|      | FHS Europeans  | Crude    | -0.003    | 0.100    | 0.979 |
|      |                | Adjusted | 0.012     | 0.099    | 0.904 |
|      | Combined       | Crude    | -0.140    | 0.067    | 0.036 |
|      |                | Adjusted | 0.019     | 0.047    | 0.680 |
| Sex  | ARIC Europeans | Crude    | -0.005    | 0.004    | 0.299 |
|      |                | Adjusted | -0.005    | 0.004    | 0.239 |
|      | FHS Europeans  | Crude    | -0.001    | 0.006    | 0.915 |
|      |                | Adjusted | -0.002    | 0.006    | 0.692 |
|      | Combined       | Crude    | -0.003    | 0.003    | 0.368 |
|      |                | Adjusted | -0.004    | 0.003    | 0.232 |
| BMI  | ARIC Europeans | Crude    | -0.036    | 0.037    | 0.339 |
|      |                | Adjusted | -0.042    | 0.037    | 0.255 |
|      | FHS Europeans  | Crude    | -0.087    | 0.059    | 0.138 |
|      |                | Adjusted | -0.088    | 0.057    | 0.125 |
|      | Combined       | Crude    | -0.050    | 0.032    | 0.118 |
|      |                | Adjusted | -0.060    | 0.031    | 0.057 |
| PCA1 | ARIC Europeans | Crude    | 0.000004  | 0.000004 | 0.294 |
|      |                | Adjusted | 0.000005  | 0.000003 | 0.160 |
|      | FHS Europeans  | Crude    | 0.0003    | 0.0001   | 0.021 |
|      |                | Adjusted | 0.0003    | 0.0001   | 0.028 |
|      | Combined       | Crude    | 0.00016   | 0.00005  | 0.001 |
|      |                | Adjusted | 0.0001    | 0.00005  | 0.024 |
| PCA2 | ARIC Europeans | Crude    | -0.000035 | 0.000075 | 0.642 |
|      |                | Adjusted | -0.000069 | 0.000068 | 0.305 |
|      | FHS Europeans  | Crude    | -0.00015  | 0.00017  | 0.399 |
|      |                | Adjusted | -0.00013  | 0.00017  | 0.449 |
|      | Combined       | Crude    | -0.00007  | 0.00008  | 0.378 |
|      |                | Adjusted | -0.00007  | 0.00008  | 0.364 |

Each independent test variable was adjusted by the other four variables (as a possible confounder). The combined analysis was additionally adjusted by study of origin. BMI, body mass index; PCA, principal component analysis.
